# Supplementary material for: A novel germanate based red-emitting phosphor with high efficiency, high color purity and thermal stability for white light-emitting diodes and field emission displays
Source: Royal Society of Chemistry journal article supplement (doi:10.1039/c9qi01428d), 2020-01-01
Supplement: c9qi01428d1.pdf [file c9qi01428d1.pdf]

## A novel germanate based red-emitting phosphor with high efficiency, high color purity and thermal stability for white light-emitting diodes and field emission displays

Qiang Zhang, Xicheng Wang and Yuhua Wang\*

Key Laboratory of Special Function Materials and Structure Design, Ministry of Education,  
Department of Materials Science, School of Physical Science and Technology,

National & Local Joint Engineering Laboratory for Optical Conversion Materials and  
Technology, Lanzhou University, Lanzhou, China

Corresponding author's email: [wyh@lzu.edu.cn](mailto:wyh@lzu.edu.cn).

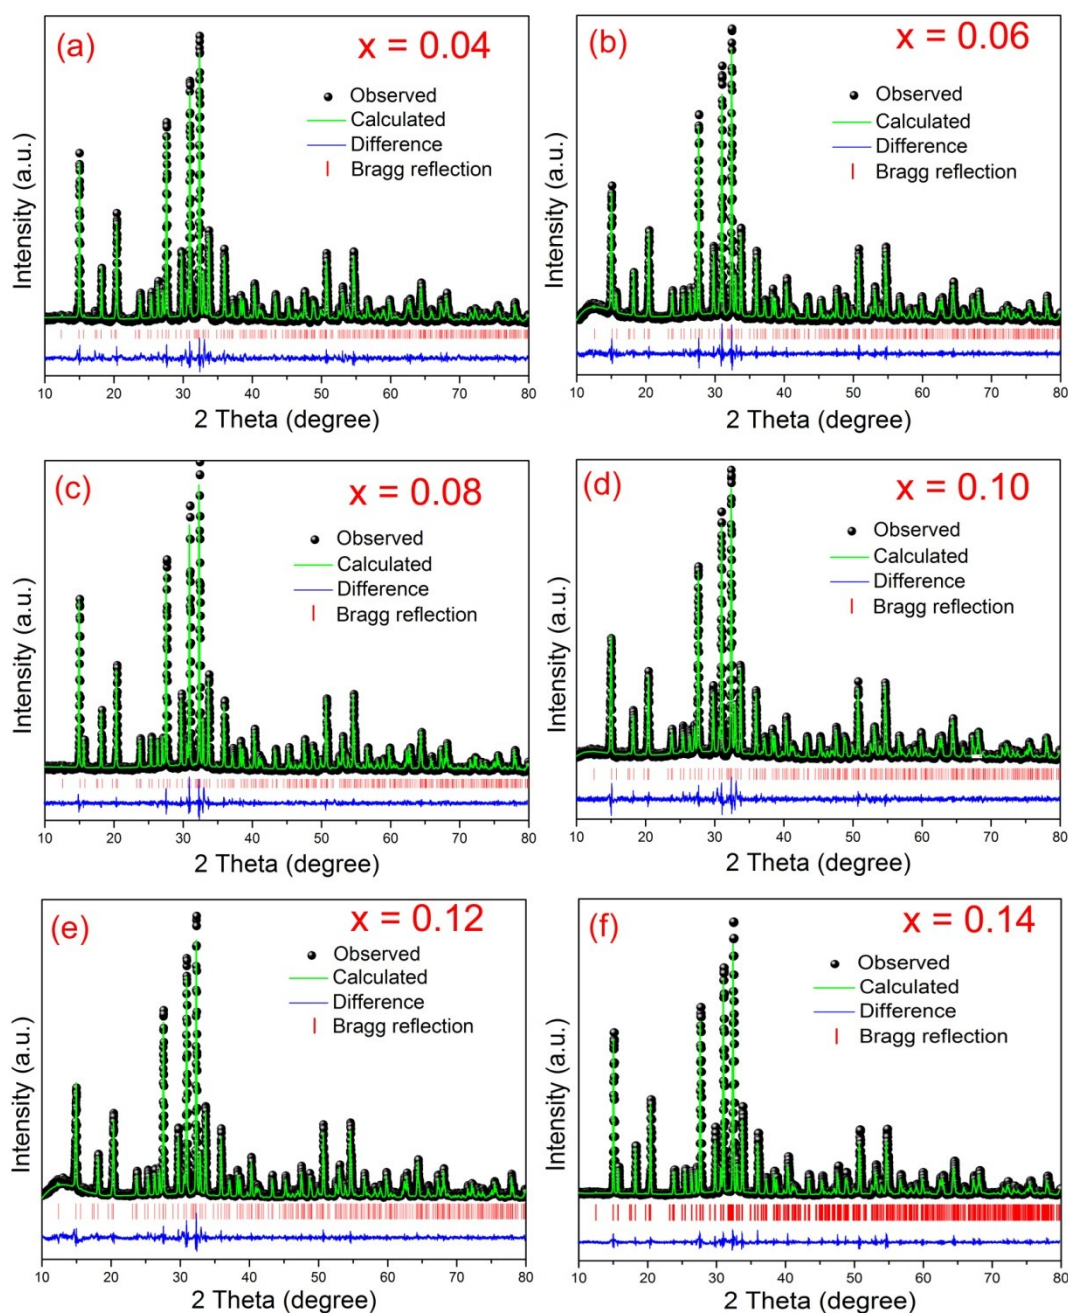

Fig. S1 (a-f) Rietveld refinement results of KSGO:  $x\text{Eu}^{3+}$  ( $0.04 \leq x \leq 0.14$ ) phosphors.

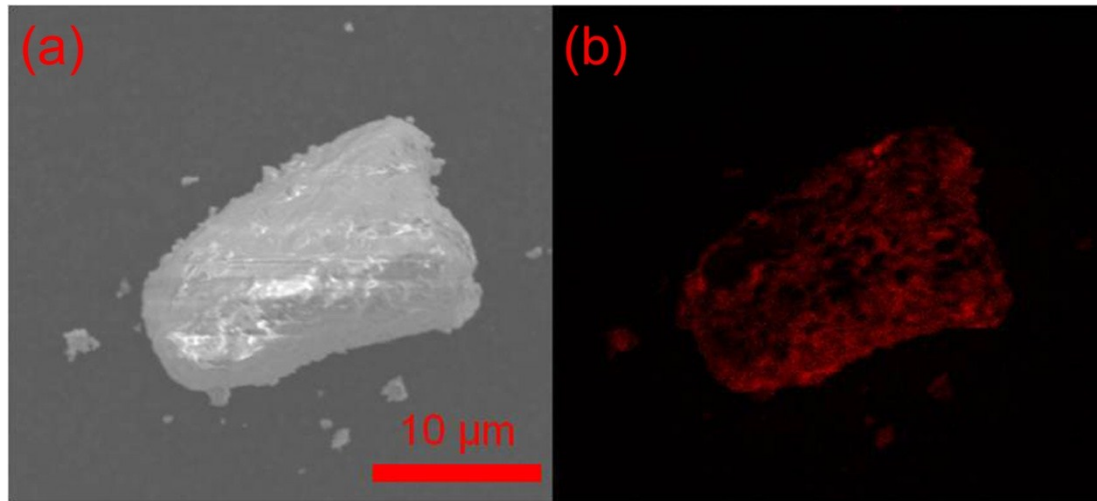

Fig. S2 SEM image (a) and CL mapping image (b) of KSGO: 0.08Eu<sup>3+</sup> phosphor monitored at 617 nm of the same area.

Table. S1 main parameters of processing and refinement of KSGO:  $x\text{Eu}^{3+}$  ( $0.04 \leq x \leq 0.14$ ) phosphors.

| $x$             | 0.04         | 0.06         | 0.08         | 0.10         | 0.12         | 0.14         |
|-----------------|--------------|--------------|--------------|--------------|--------------|--------------|
| Space group     | P-3c1        | P-3c1        | P-3c1        | P-3c1        | P-3c1        | P-3c1        |
| $a/\text{Å}$    | 11.56901(13) | 11.56796(20) | 11.56712(18) | 11.56494(12) | 11.56233(23) | 11.56029(27) |
| $b/\text{Å}$    | 11.56901(13) | 11.56796(20) | 11.56712(18) | 11.56494(12) | 11.56233(23) | 11.56029(27) |
| $c/\text{Å}$    | 19.1735(5)   | 19.1709(4)   | 19.1698(4)   | 19.1664(3)   | 19.1629(5)   | 19.1605(9)   |
| $V/\text{Å}^3$  | 2222.41(6)   | 2221.70(9)   | 2221.16(9)   | 2220.03(6)   | 2218.62(11)  | 2217.56(24)  |
| $Z$             | 6            | 6            | 6            | 6            | 6            | 6            |
| $R_{\text{wp}}$ | 7.67%        | 8.81%        | 7.84%        | 7.36%        | 7.28%        | 7.95%        |
| $R_{\text{p}}$  | 6.16%        | 7.21%        | 6.66%        | 5.91%        | 6.26%        | 6.03%        |
| $\chi^2$        | 1.80         | 2.58         | 2.44         | 1.90         | 1.79         | 1.89         |

Table. S2 PL properties of some Eu<sup>3+</sup>-activated phosphors.

| Phosphor                                                                           | Main peak of emission | CIE coordinates | Color purity | QY (%) | $I_{150^\circ\text{C}}$ (%) | Ref.      |
|------------------------------------------------------------------------------------|-----------------------|-----------------|--------------|--------|-----------------------------|-----------|
| KSGO:Eu <sup>3+</sup>                                                              | 617 nm                | (0.670,0.329)   | 95.5%        | 57.6   | 80.9                        | This work |
| Na <sub>3</sub> Sc <sub>2</sub> (PO <sub>4</sub> ) <sub>3</sub> :Eu <sup>3+</sup>  | 621 nm                | (0.642,0.353)   | 87%          | 49     | 73.4                        | 1         |
| Ca <sub>2</sub> YZr <sub>2</sub> Al <sub>3</sub> O <sub>12</sub> :Eu <sup>3+</sup> | 611 nm                | (0.628,0.360)   | –            | –      | 62                          | 2         |
| Ca <sub>3</sub> GdNa(PO <sub>4</sub> ) <sub>3</sub> F:Eu <sup>3+</sup>             | 620 nm                | (0.654,0.346)   | –            | 40     | –                           | 3         |
| Sr <sub>2</sub> LaSbO <sub>6</sub> :Eu <sup>3+</sup>                               | 610 nm                | (0.634,0.354)   | –            | 48.3   | 71.2                        | 4         |
| Na <sub>0.5</sub> Gd <sub>0.5</sub> MoO <sub>4</sub> :Eu <sup>3+</sup>             | 615 nm                | (0.667,0.332)   | 97.8%        | –      | 60.4                        | 5         |

## Supplementary References

1. H. Guo, X. Huang and Y. Zeng, Synthesis and photoluminescence properties of novel highly thermal-stable red-emitting Na<sub>3</sub>Sc<sub>2</sub>(PO<sub>4</sub>)<sub>3</sub>: Eu<sup>3+</sup> phosphors for UV-excited white-light-emitting diodes, *J Alloy Comp.*, 2018, **741**, 300–306.
2. X. Wang, Z. Zhao, Q. Wu, Y. Li and Y. Wang, A garnet-based Ca<sub>2</sub>YZr<sub>2</sub>Al<sub>3</sub>O<sub>12</sub>: Eu<sup>3+</sup> red-emitting phosphor for n-UV light emitting diodes and field emission displays: electronic structure and luminescence properties, *Inorg. Chem.*, 2016, **55**, 11072–11077.
3. X. Wu, W. Bai, O. Hai, Q. Ren, F. Lin and Y. Jiao, Crystal structure and luminescence properties of a novel red Ca<sub>3</sub>GdNa(PO<sub>4</sub>)<sub>3</sub>F: Eu<sup>3+</sup> phosphor for white LEDs, *Optics. Laser Technol.*, 2018, **107**, 46–53.
4. J. Zhong, M. Xu, D. Chen, G. Xiao and Z. Ji, Novel red-emitting Sr<sub>2</sub>LaSbO<sub>6</sub>: Eu<sup>3+</sup> phosphor with enhanced <sup>5</sup>D<sub>0</sub>→<sup>7</sup>F<sub>4</sub> transition for warm white light-emitting diodes, *Dyes Pigments*, 2017, **146**, 272–278.
5. L. Zhou, L. Yi, R. Sun, F. Gong and J. Sun, A Potential Red Phosphor Na<sub>0.5</sub>Gd<sub>0.5</sub>MoO<sub>4</sub>: Eu<sup>3+</sup> For Light-Emitting Diode Application, *J. Am. Ceram. Soc.*, 2008, **91**, 3416–3418.
